# Supplementary material for: Selective tandem electroreduction of nitrate to nitrogen via copper–cobalt based bimetallic hollow nanobox catalysts
Source: Royal Society of Chemistry journal article supplement (doi:10.1039/d3en00403a), 2023-01-01
Supplement: d3en00403a1.pdf [file d3en00403a1.pdf]

*Electronic supplementary information (ESI)*

**Selective Tandem Electroreduction of Nitrate to Nitrogen via  
Copper-Cobalt Based Bimetallic Hollow Nanobox Catalysts**

Ruoqing Wu, Tingting Yan, Kai Zhang, Zhenlin Wang, Haiyan Duan, Qiuying Yi,  
Danhong Cheng,\* and Dengsong Zhang\*

International Joint Laboratory of Catalytic Chemistry, Department of Chemistry,  
College of Sciences, Shanghai University, Shanghai 200444, P. R. China.

\*E-mail: dszhang@shu.edu.cn (DS Zhang); cdh@shu.edu.cn (DH Cheng).

The Supporting Information includes [34](#) Pages, [14](#) Figures and [9](#) Tables.

## Table of Contents

|                                               |     |
|-----------------------------------------------|-----|
| <b>Materials and reagents</b> .....           | S4  |
| <b>Experimental section</b> .....             | S4  |
| <b>Characterizations</b> .....                | S6  |
| <b>Electrochemical tests</b> .....            | S6  |
| <b><i>In situ</i> DEMS measurements</b> ..... | S7  |
| <b>Analytical methods</b> .....               | S8  |
| <b>Data analysis</b> .....                    | S9  |
| <b>Fig. S1</b> .....                          | S10 |
| <b>Fig. S2</b> .....                          | S11 |
| <b>Fig. S3</b> .....                          | S12 |
| <b>Fig. S4</b> .....                          | S13 |
| <b>Fig. S5</b> .....                          | S14 |
| <b>Fig. S6</b> .....                          | S15 |
| <b>Fig. S7</b> .....                          | S16 |
| <b>Fig. S8</b> .....                          | S17 |
| <b>Fig. S9</b> .....                          | S18 |
| <b>Fig. S10</b> .....                         | S19 |
| <b>Fig. S11</b> .....                         | S20 |
| <b>Fig. S12</b> .....                         | S21 |
| <b>Fig. S13</b> .....                         | S22 |
| <b>Fig. S14</b> .....                         | S23 |

|                          |     |
|--------------------------|-----|
| <b>Table S1</b> .....    | S24 |
| <b>Table S2</b> .....    | S25 |
| <b>Table S3</b> .....    | S26 |
| <b>Table S4</b> .....    | S27 |
| <b>Table S5</b> .....    | S28 |
| <b>Table S6</b> .....    | S29 |
| <b>Table S7</b> .....    | S30 |
| <b>Table S8</b> .....    | S31 |
| <b>Table S9</b> .....    | S32 |
| <b>REFERENCES:</b> ..... | S33 |

## Materials and reagents

All of the chemicals and reagents were of analytical grade and used as received without any further purification. Cobalt nitrate hexahydrate ( $\text{Co}(\text{NO}_3)_2 \cdot 6\text{H}_2\text{O}$ ), copper nitrate trihydrate ( $\text{Cu}(\text{NO}_3)_2 \cdot 3\text{H}_2\text{O}$ ), hexadecyl trimethyl ammonium bromide (CTAB), sodium nitrate ( $\text{NaNO}_3$ ), sodium sulfate ( $\text{Na}_2\text{SO}_4$ ) and commercial CuO were purchased from Sinopharm Chemical Reagent Co. Ltd (Shanghai, China). 2-methylimidazole and poly tetra fluoroethylene (PTFE) were obtained from Aladdin (Shanghai, China).

## Experimental section

Synthesis of ZIF-67 nanocube: The ZIF-67 nanocube were synthesized mainly according to the reference,<sup>1</sup> and made the appropriate adjustment basing on the actual situation. In a typical synthesis, 580 mg of  $\text{Co}(\text{NO}_3)_2 \cdot 6\text{H}_2\text{O}$  was dissolved in 20 mL of deionized water containing 8 mg of hexadecyl trimethyl ammonium bromide (CTAB). Then this solution was rapidly injected into 140 mL of aqueous solution containing 9.08 g 2-methylimidazole and stirred rapidly at room temperature for 40 min, and then stand at room temperature for 12 h. The product was collected by centrifugation, washed by ethanol for three times and dried at 60 °C overnight to obtain ZIF-67 nanocube.

Synthesis of ZIF-67@Cu-Co LDH nanobox: First, 0.4 g ZIF-67 nanocube was dispersed into 80 mL of ethanol. Then 20 mL of ethanol solution containing 0.8 g  $\text{Cu}(\text{NO}_3)_2 \cdot 3\text{H}_2\text{O}$  was added drop by drop, and the mixture was put into an ultrasonic bath for 90 min. Finally, the product was collected by centrifugation and washed three times with ethanol, and dried overnight at 60 °C to obtain ZIF-67@Cu-Co LDH

nanobox, called Cu–Co LDH. To change the ratio of Cu and Co, the same amount of ZIF–67 was used as template, and 0.2 g, 0.4 g and 1.2 g of  $\text{Cu}(\text{NO}_3)_2 \cdot 3\text{H}_2\text{O}$  were added to obtain Cu–Co<sub>1–2</sub> LDH, Cu–Co<sub>1–1</sub> LDH, Cu–Co<sub>3–1</sub> LDH, respectively.

Synthesis of Cu–Co HNB: The obtained ZIF–67@Cu–Co LDH was used as precursor and further annealed at 400 °C for 2 h at a ramp rate of 1.5 °C/min under a flow of Ar atmosphere to obtain Cu–Co hollow nanobox catalyst (Cu–Co HNB). In addition, Cu–Co<sub>1–2</sub> HNB, Cu–Co<sub>1–1</sub> HNB and Cu–Co<sub>3–1</sub> HNB were prepared with Cu–Co<sub>1–2</sub> LDH, Cu–Co<sub>1–1</sub> LDH and Cu–Co<sub>3–1</sub> LDH as precursor at the same calcination conditions as above, respectively.

Similarly, the ZIF–67@Cu–Co LDH was calcinated at 400 °C, 500 °C and 600 °C to obtain the Cu–Co–400 HNB, Cu–Co–500 HNB and Cu–Co–600 HNB, respectively.

Synthesis of calcined ZIF–67(cal–ZIF–67): The cal–ZIF–67 was prepared by thermal treatment with the pre–prepared ZIF–67 as precursor, under the same conditions as Cu–Co HNB synthesis process.

Synthesis of Cu Co mixture: With 20 mL ethanol as solvent, 0.1 g cal–ZIF–67 and 0.2 g commercial CuO were mixed and ultrasonicated for 60 min, followed by drying to obtain Cu Co mixture.

Synthesis of Cu–Co NPs: 20 mL aqueous solution containing 0.4 g  $\text{Cu}(\text{NO}_3)_2 \cdot 3\text{H}_2\text{O}$  and 0.2 g  $\text{Co}(\text{NO}_3)_2 \cdot 6\text{H}_2\text{O}$  was added dropwise to  $\text{Na}_2\text{CO}_3$  solution (0.5 mol/L, 100 mL) with continuous stirring at 60 °C. After stirring for 2 h, the dark solution was cooled to room temperature and then filtered, washed three times with deionized water,

and finally dried overnight at 60 °C. The dried black powder was annealed under the same conditions as above to obtain the Cu–Co NPs.

Synthesis of cathod: A mixture of 10 mg catalysts, 1.25 mg acetylene black and 22  $\mu$ L PTFE (wt 5%) were mixed adequately and coated on 1 $\times$ 2 cm<sup>2</sup> nickel foam, followed by drying in oven for more than 8 h.

### **Characterizations**

The surface morphology and elemental distribution of electrocatalysts were observed using a field emission scanning electron microscope (SEM, Sigma–300) equipped with an energy dispersive spectrometer (EDS) and transmission electron microscope (TEM, JEOL JEM–2100; Tokyo; Japan) equipped with EDS. The structure composition of the materials was observed by X–ray diffractometer (XRD) (Cu–K– $\alpha$ , 40 kV mA) in a scanning range of 20–80°. X–ray photoelectron spectra (XPS) was observed by the PHI–5300 instrument for identifying the structure composition of catalysts.

### **Electrochemical tests**

The electrochemical properties were evaluated by electrochemical workstation (CHI 660E Shanghai Chenhua). The materials of working electrode was made of active material (10 mg), acetylene black, polytetrafluoroethylene (PTFE, wt 5%) aqueous dispersion at 8:1:1 weight ratio.

Amperpmetric *i*–*t* curve, linear sweep voltammetry (LSV), cyclic voltammetry (CV), and electrochemical impedance spectroscopy (EIS) were tested by the three–electrode system in a 100 ppm NaNO<sub>3</sub> and 0.1 M Na<sub>2</sub>SO<sub>4</sub> solution. Saturated calomel electrode

(SCE) were used as reference electrode and Three-dimensional nickel foam were used as counter electrode. The  $i-t$  test was performed at  $-1.3$  V vs. SCE. The LSV tests were conducted at 0 to  $-1.6$  V at  $10$  mV/s scan rate. Tafel slope was derived from LSV with a sweep speed of  $10$  mV/S. The CV measurements were performed at the range from  $0.4$  to  $-1.6$  V at  $20$  mV/s scan rate. Double layer capacitance ( $C_{dl}$ ) was determined by CV scan at different scan rates ( $20-100$  mV  $s^{-1}$ ) in a non-Faraday potential window, the plot of capacitive anode and cathode current differences  $[(j_a-j_c)/2]$  at a set potential against the CV scan rates show a linear relationship, and the slope was  $C_{dl}$ . ECSA is calculated by  $C_{dl}$ . The EIS analysis was recorded at  $100$  mHz to  $100$  kHz with  $5$  mV amplitude. The original electrolyte was neutral, and the pH of the solution was adjusted by hydrochloric acid (HCl) and sodium hydroxide (NaOH), respectively. The pH was measured by a pH electrode.

### ***In situ* differential electrochemical mass spectrometry (DEMS) measurements**

The  $100$  ppm  $\text{NaNO}_3\text{-N}$  and  $0.1$  M  $\text{Na}_2\text{SO}_4$  electrolytes are fed into a specially designed electrochemical cell via a peristaltic pump. Ar was continuously bubbled into the electrolyte before and during the dem measurement. A glassy carbon electrode coated with Cu-Co HNB, a platinum wire electrode and a saturated calomel electrode were used as working, counter and reference electrodes, respectively. LSV was tested from 0 to  $-1.6$  V vs. SCE at a scan rate of  $10$  mV  $s^{-1}$  until the baseline remained stable. Then, the corresponding mass signal appears. After the electrochemical test ends and the mass signal returns to the baseline, the next cycle begins using the same test conditions to avoid unexpected errors during dem measurements. The experiment was performed for

three consecutive cycles.

### **Analytical methods**

Determination of nitrate and nitrite. In this paper, the ion chromatograph (Soptop IC1820) with anion column (Shanghai Shunyuhengping Company) was used to detect nitrate and nitrite products. The standard curve was drawn by measuring different concentrations of sodium nitrate and sodium nitrite, and the sample concentration could be obtained by comparing the standard curve with the sample. The specific chromatographic parameters were set as follows: the quantitative ring volume of the injection liquid was 20  $\mu\text{L}$ , the eluent was 3.6  $\text{mmol}\cdot\text{L}^{-1}$   $\text{Na}_2\text{CO}_3$  solution, the flow rate was set at 0.6  $\text{mL}\cdot\text{min}^{-1}$ , and the detection time was 36 min. In order to prevent the error caused by the high concentration of sulfate in the electrolyte, the sample was diluted 10 times for analysis. Nitrate and nitrite peaked at about 23 and 15 min, respectively. The linear fitting equation of the standard curve was shown in [Fig. S14](#).

Determination of ammonia. The concentration of  $\text{NH}_3$  produced in the nitrogen reduction reaction was measured by the indophenol blue method. The electrolyte was diluted to an appropriate concentration to match the range of the UV-vis absorption spectrum (TU-1950). First, 2 mL aliquot of the solution was removed from the electrochemical reaction vessel. Then, 2 mL NaOH solution (1 M) containing 5 wt% salicylic acid and 5 wt% sodium citrate was added, and followed by the addition of 1 mL NaClO (0.05 M) and 0.2 mL  $\text{C}_3\text{FeN}_6\text{Na}_2\text{O}$  (sodium nitroferricyanide, 1 wt%). After one hour at room temperature, the UV-vis absorption spectrum was measured at a wavelength of 500–800 nm. The formation of indophenol blue was determined using



the absorbance at a wavelength of 655 nm. A concentration–absorbance curve was drawn to obtain the standard curve, and the linear equation obtained by linear fitting was used to calculate the ammonia concentration, as shown in Fig. S14.

Determination of copper and cobalt ions. The ICP–OES (ICAP 7000 Series, Thermo Fisher Scientific; Waltham; USA) was applied to test the ions concentration and analyze the leaching of Cu and Co ions from Cu–Co HNB and Cu–Co mixture after 12 h electrocatalytic nitrate reduction were analyzed.

### Data analysis

A series of data that can be used to analyze the performance of electrocatalytic denitrification, the selectivity of nitrite ( $S_{NO_2^-}(\%)$ ), ammonia ( $S_{NH_4^+}(\%)$ ) were calculated according to the following equations.

$$S_{NH_4^+}(\%) = \frac{C_t(NH_4^+)}{C_0(NO_3^-) - C_t(NO_3^-)} \times 100\% \quad (1)$$

$$S_{NO_2^-}(\%) = \frac{C_t(NO_2^-)}{C_0(NO_3^-) - C_t(NO_3^-)} \times 100\% \quad (2)$$

The measurement of  $N_2$  was mainly obtained by the subtraction method, because the amount of other gas products (NO,  $N_2O$ ) generated in the electrocatalytic system was very small and could be omitted.

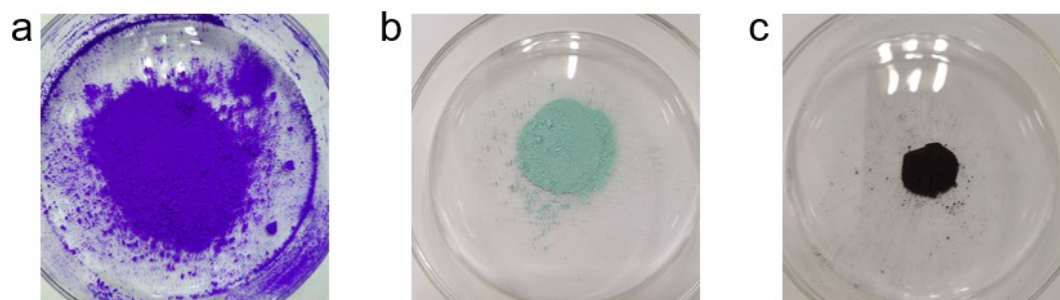

**Fig. S1.** The digital photograph of key steps. (a) Bright purple ZIF-67; (b) light blue Cu-Co<sub>2-1</sub> LDH; (c) dark gray Cu-Co<sub>2-1</sub> HNB.

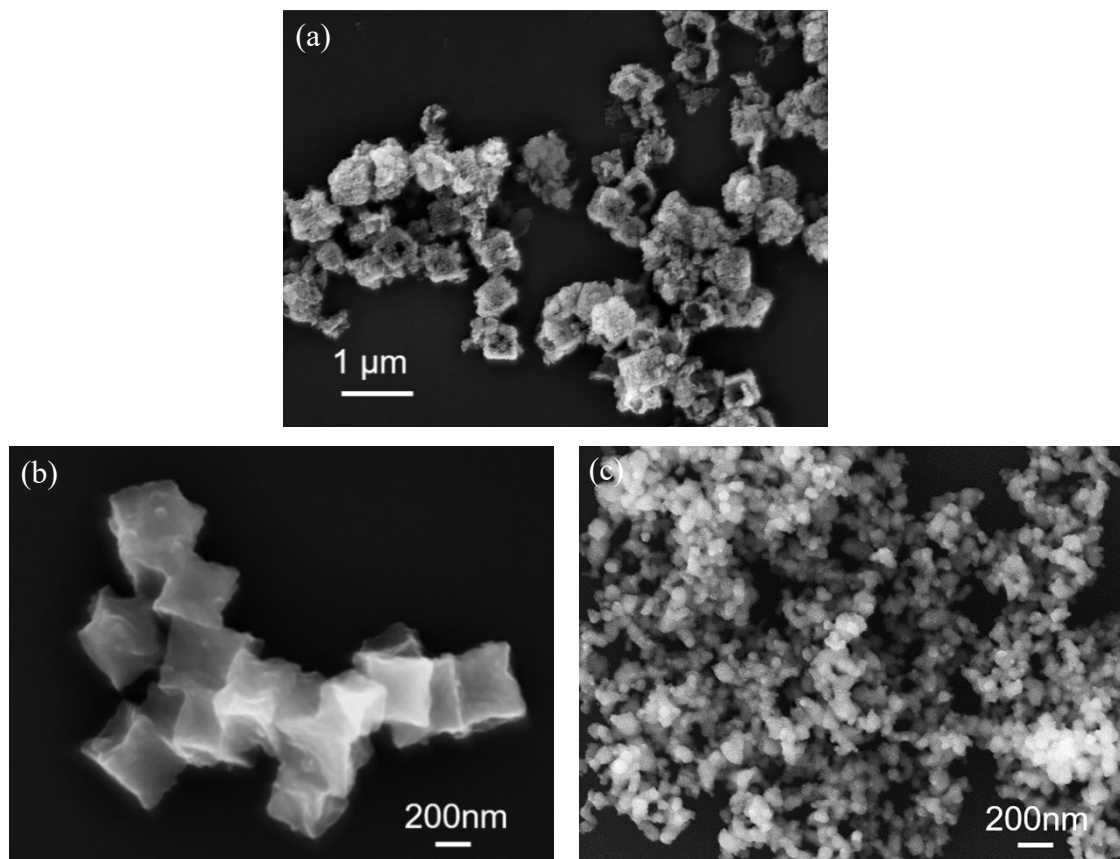

**Fig. S2.** SEM images of (a) broken Cu-Co<sub>2-1</sub> LDH nanoparticles, (b) cal-ZIF-67 and (c) commercial CuO nanoparticles.

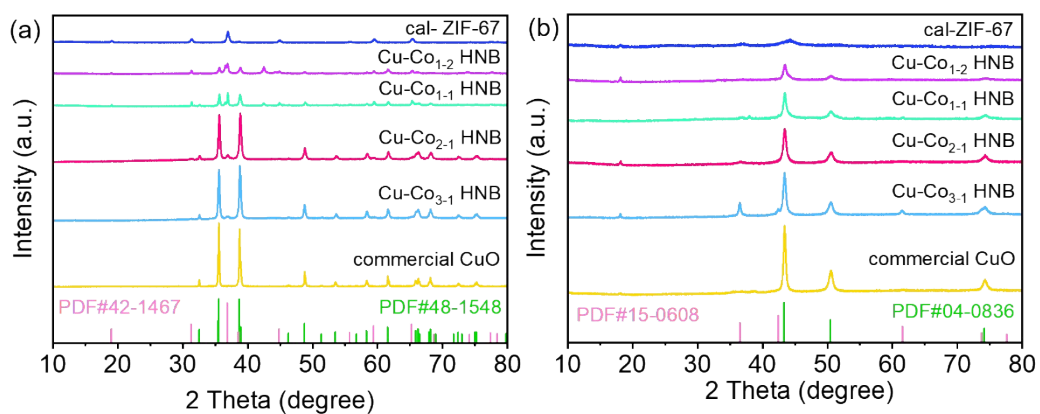

**Fig. S3.** XRD patterns of the synthesized samples with different mass ratios (a) before and (b) after reduction reaction.

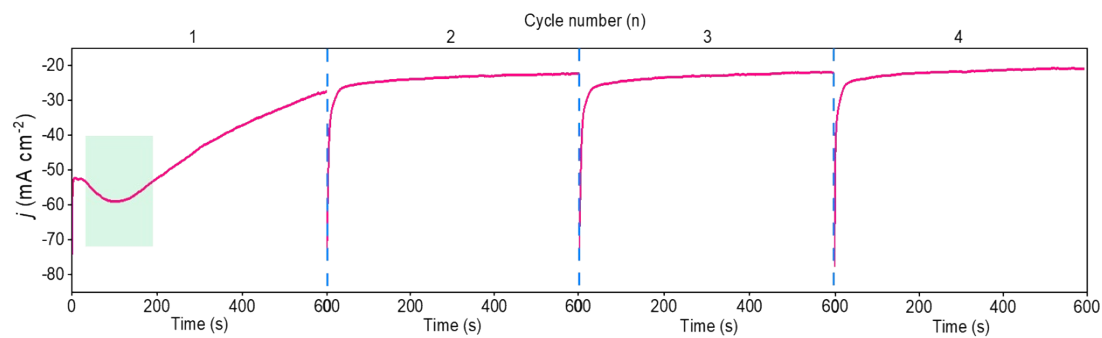

**Fig. S4.** Chronoamperometry curves of Cu-Co<sub>2-1</sub> HNB during four consecutive cycling nitrate reduction processes at -1.3 V vs. SCE. (100 ppm NO<sub>3</sub><sup>-</sup>-N and 0.1 M Na<sub>2</sub>SO<sub>4</sub>, with agitation, neutral pH)

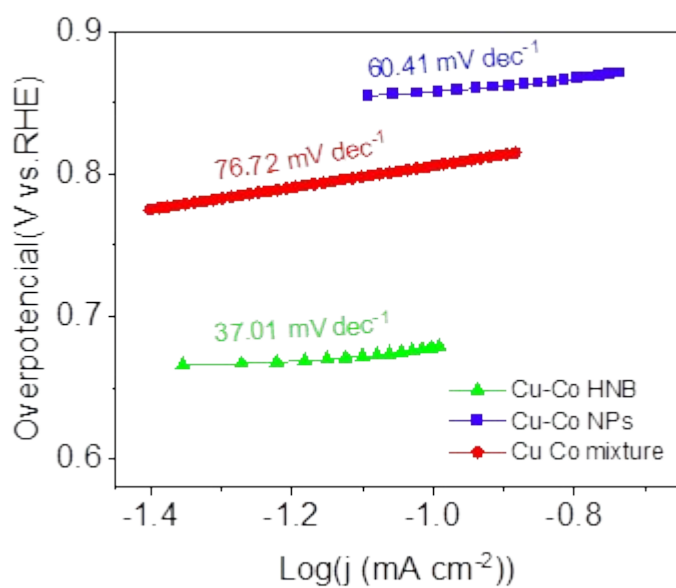

**Fig. S5.** The LSV-derived Tafel slopes of Cu-Co HNB, Cu-Co NPs and Cu Co mixture.

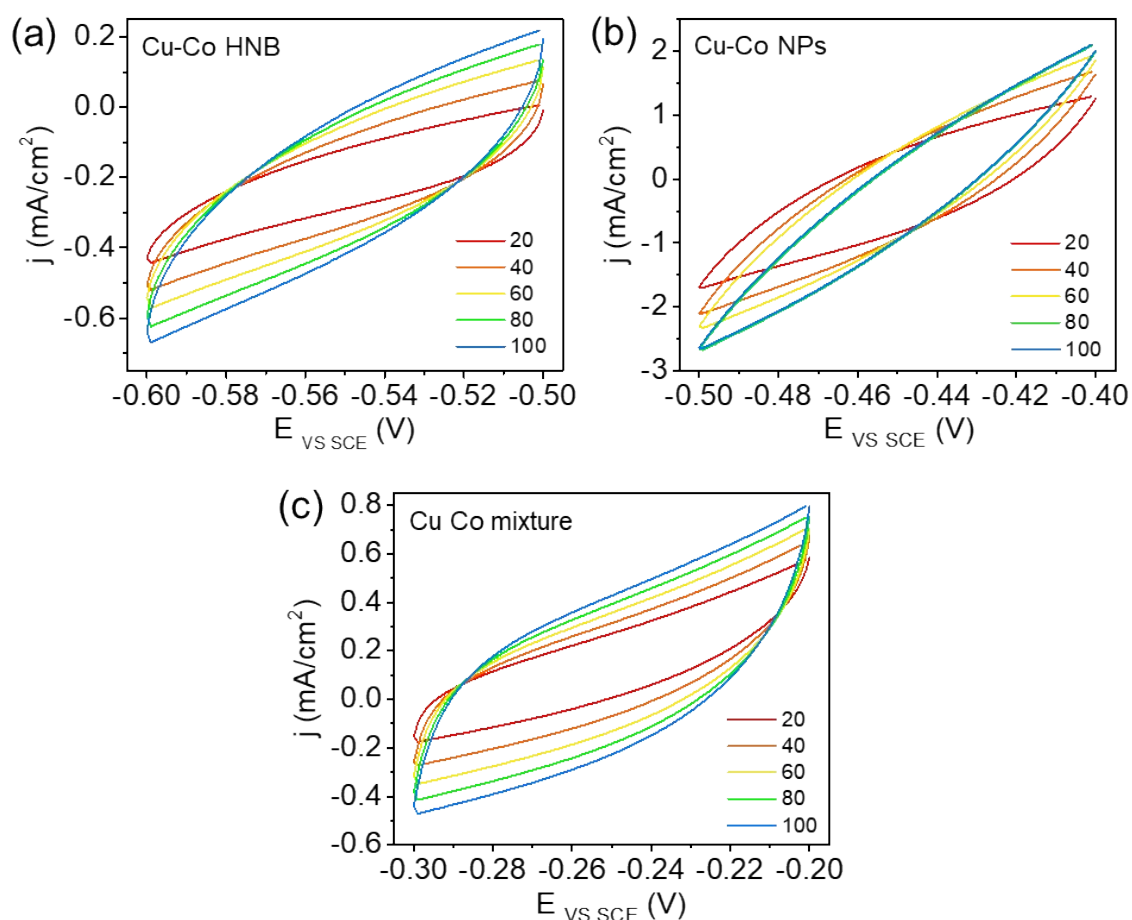

**Fig. S6.** Determination of the electrochemically active surface area (ECSA) by measuring the double-layer capacitance from cyclic voltammograms obtained at various scan rates (20, 40, 60, 80, and 100 mV/s): (a) Cu–Co HNB, (b) Cu–Co NPs and (c) Cu Co mixture.

The double layer capacitance ( $C_{dl}$ ) of different materials was determined to be 2.42 mF·cm<sup>-2</sup> (Cu–Co HNB), 1.52 mF·cm<sup>-2</sup> (Cu Co mixture) and 0.88 mF·cm<sup>-2</sup> (Cu–Co NPs). The ECSA was calculated according to the equation:  $ECSA = C_{dl}/\text{specific capacitance}$  (assuming the specific capacitance of 0.04 mF·cm<sup>-2</sup>·cm<sup>-2</sup>). The ECSA of Cu–Co HNB, Cu Co mixture and Cu–Co NPs were 60.5, 38 and 22 cm<sup>2</sup>·g<sup>-1</sup><sub>catalyst</sub>, respectively.

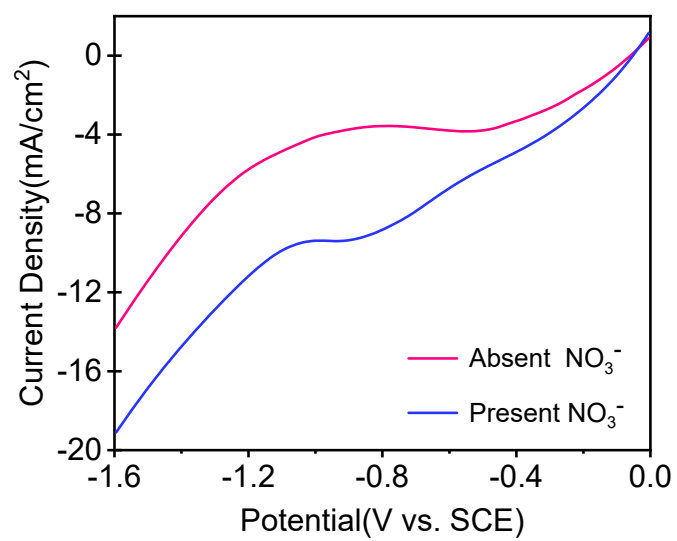

**Fig. S7.** LSV curves of Cu–Co HNB cathode in the absence and presence of nitrate.



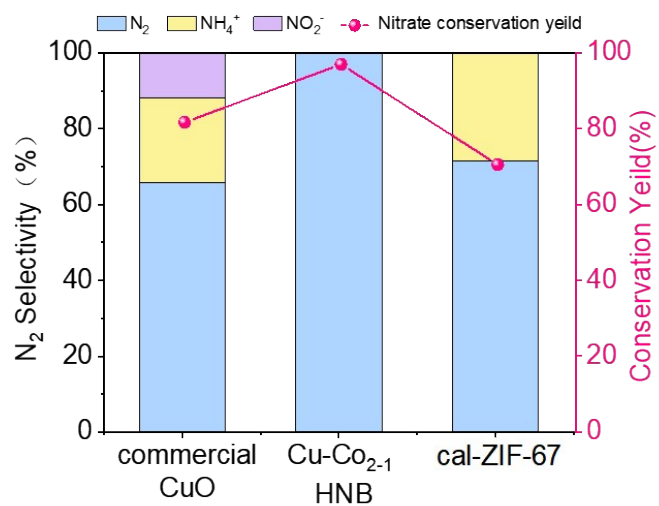

**Fig. S8.** The change of conversion yield and product selectivity of commercial CuO, Cu-Co<sub>2-1</sub> HNB and cal-ZIF-67 electrodes in NRR process.

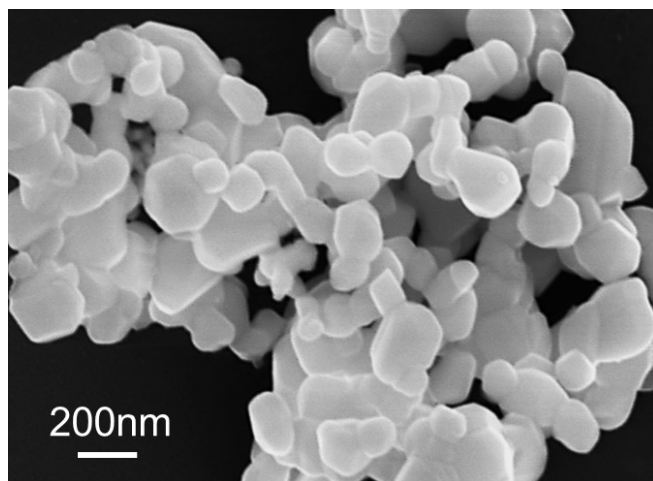

**Fig. S9.** SEM image of Cu-Co-600 HNB.

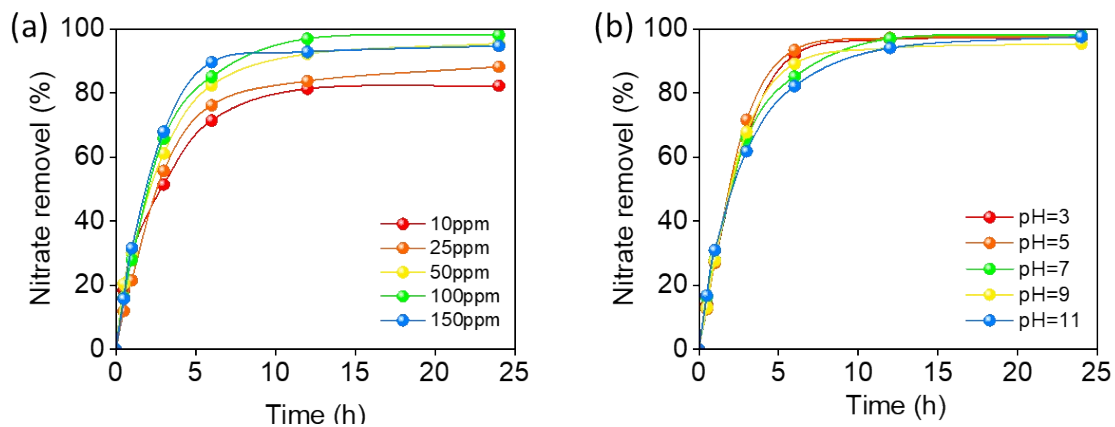

**Fig. S10.** The conversion rate of  $\text{NO}_3^-$  in Cu-Co HNB electrocatalytic system at (a) different concentrations of  $\text{NO}_3^-$ -N and (e) different initial pH.

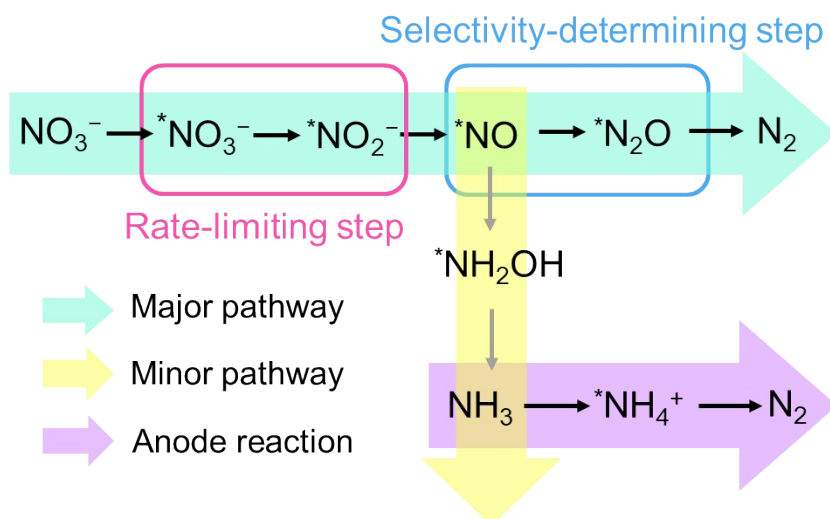

**Fig. S11.** Nitrate reduction pathway by Cu–Co HNB electrode.

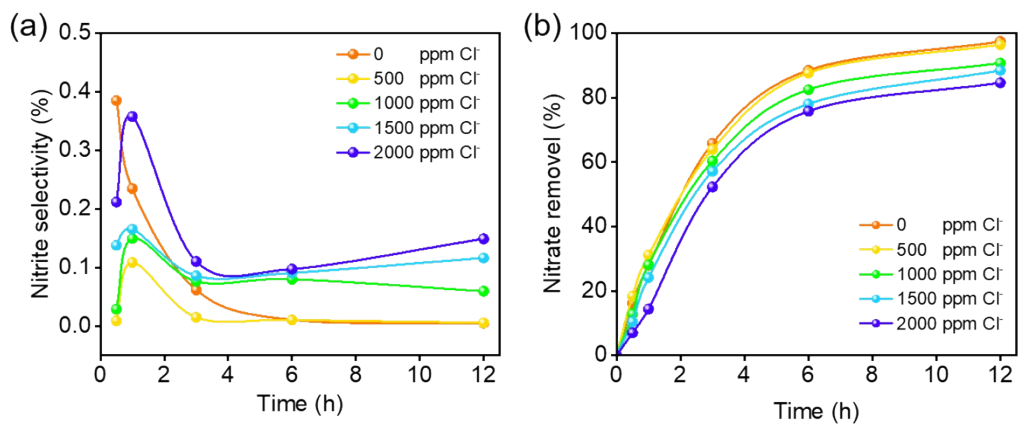

**Fig. S12.** Effects of different concentrations of  $\text{Cl}^-$  on (a) the electrocatalytic  $\text{NO}_3^-$  conversion rate and (b) the products selectivity of  $\text{NO}_2^-$  within 12 h of Cu-Co HNB.

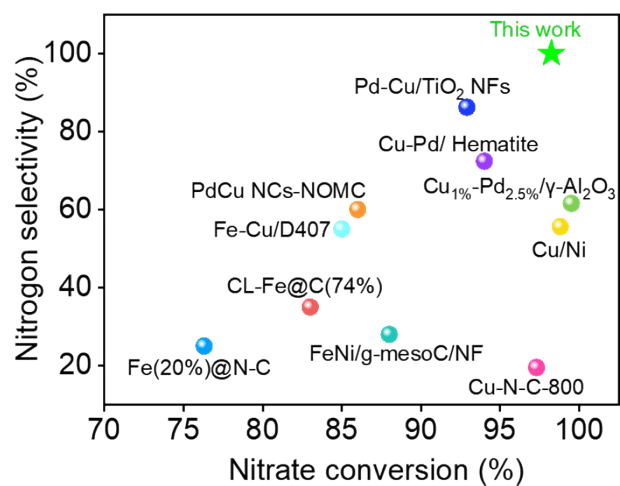

**Fig. 13.** Performance of different catalysts for electrocatalytic reduction of nitrate in Cl-free systems.

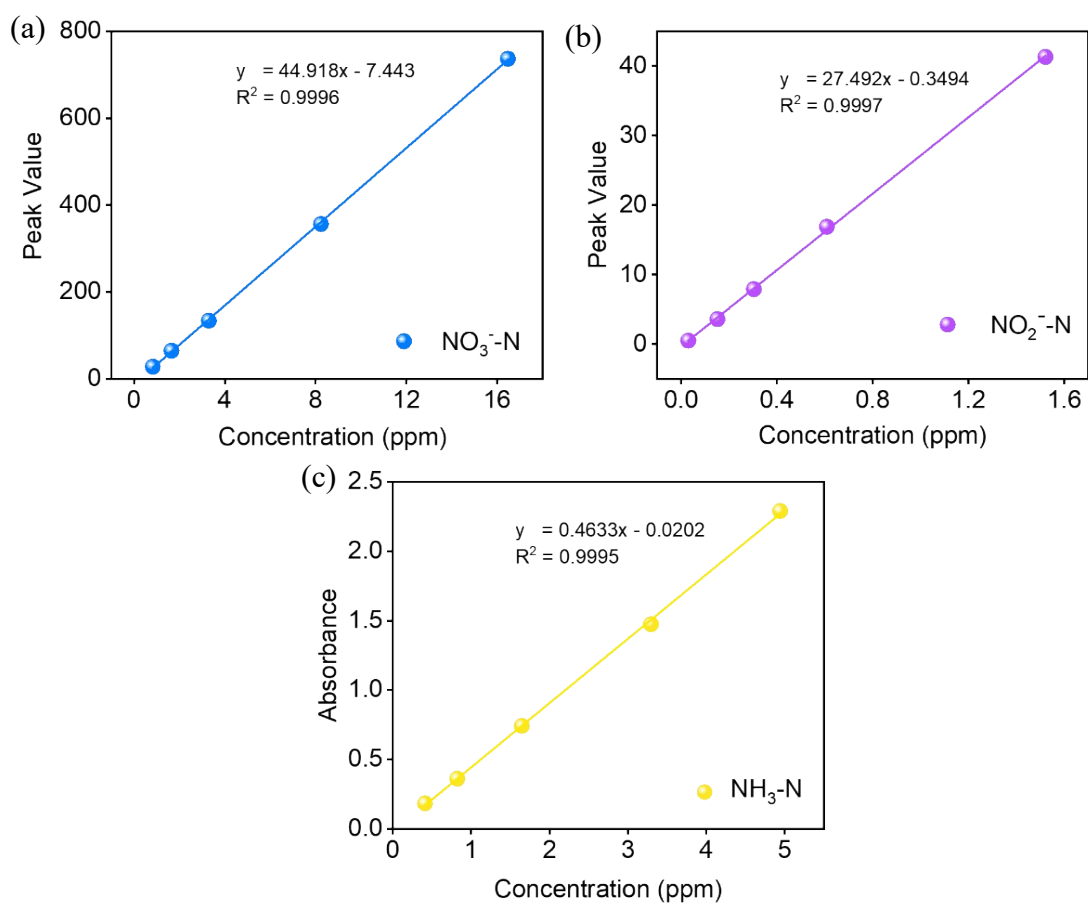

**Fig. S14.** Concentration standard curve of (a) NO<sub>3</sub><sup>-</sup>-N, (b) NO<sub>2</sub><sup>-</sup>-N, (c) NH<sub>3</sub>-N.

**Table S1.** Electrocatalytic reduction performance of Cu–Co HNB with different Cu–Co mass ratios.

| <b>Electrocatalyst</b>   | <b>Nitrate<br/>Removal (%)</b> | <b>N<sub>2</sub><br/>Selectivity (%)</b> | <b>NH<sub>4</sub><sup>+</sup><br/>Selectivity (%)</b> | <b>NO<sub>2</sub><sup>-</sup><br/>Selectivity (%)</b> |
|--------------------------|--------------------------------|------------------------------------------|-------------------------------------------------------|-------------------------------------------------------|
| Cu–Co <sub>3-1</sub> HNB | 97.7704                        | 99.9727                                  | 0.02442                                               | 0.00288                                               |
| Cu–Co HNB                | 98.14277                       | 99.99881                                 | 0                                                     | 0.00119                                               |
| Cu–Co <sub>1-1</sub> HNB | 92.01691                       | 73.31165                                 | 26.62835                                              | 0.06                                                  |
| Cu–Co <sub>1-2</sub> HNB | 88.7046                        | 11.38611                                 | 88.61012                                              | 0.00377                                               |
| cal–ZIF–67               | 70.54059                       | 71.37246                                 | 28.60755                                              | 0.01999                                               |
| commercial CuO           | 81.7036                        | 65.63637                                 | 22.57671                                              | 11.78692                                              |



**Table S2.** Electrocatalytic reduction performance of Cu–Co HNB calcined at different temperatures.

| <b>Temperature (°C)</b> | <b>Nitrate Removal (%)</b> | <b>N<sub>2</sub> Selectivity (%)</b> | <b>NH<sub>4</sub><sup>+</sup> Selectivity (%)</b> | <b>NO<sub>2</sub><sup>-</sup> Selectivity (%)</b> |
|-------------------------|----------------------------|--------------------------------------|---------------------------------------------------|---------------------------------------------------|
| Cu–Co–400 HNB           | 98.1428                    | 99.9988                              | 0                                                 | 0.00119                                           |
| Cu–Co–500 HNB           | 97.9881                    | 99.9727                              | 0.01215                                           | 0.015151                                          |
| Cu–Co–600 HNB           | 90.0932                    | 51.2996                              | 48.6257                                           | 0.074783                                          |

**Table S3.** Electrocatalytic reduction performance of Cu–Co HNB at different concentrations of  $\text{NO}_3^-$ -N.

| $C_0$ ( $\text{NO}_3^-$ -N)<br>(ppm) | Nitrate<br>Removal (%) | $\text{N}_2$<br>Selectivity<br>(%) | $\text{NH}_4^+$<br>Selectivity<br>(%) | $\text{NO}_2^-$<br>Selectivity<br>(%) |
|--------------------------------------|------------------------|------------------------------------|---------------------------------------|---------------------------------------|
| 10                                   | 82.33981               | 98.84064                           | 0.83979                               | 0.31957                               |
| 25                                   | 88.84179               | 98.1373864                         | 1.798542                              | 0.064071                              |
| 50                                   | 95.55573               | 99.75253                           | 0.24266                               | 0.00481                               |
| 100                                  | 98.1428                | 99.9988                            | 0                                     | 0.00119                               |
| 150                                  | 92.93605               | 67.38297                           | 32.55954                              | 0.05749                               |

**Table S4.** Electrocatalytic reduction performance of Cu–Co HNB at different initial pH.

| <b>Initial<br/>pH value</b> | <b>Nitrate<br/>Removal (%)</b> | <b>N<sub>2</sub><br/>Selectivity<br/>(%)</b> | <b>NH<sub>4</sub><sup>+</sup><br/>Selectivity<br/>(%)</b> | <b>NO<sub>2</sub><sup>-</sup><br/>Selectivity<br/>(%)</b> |
|-----------------------------|--------------------------------|----------------------------------------------|-----------------------------------------------------------|-----------------------------------------------------------|
| 3                           | 97.25613                       | 28.96935                                     | 71.01129                                                  | 0.01935                                                   |
| 5                           | 97.77919                       | 15.03358                                     | 84.96403                                                  | 0.00239                                                   |
| 7                           | 98.14277                       | 99.99881                                     | 0                                                         | 0.00119                                                   |
| 9                           | 95.42188                       | 91.30402                                     | 7.67801                                                   | 1.01797                                                   |
| 11                          | 97.64419                       | 98.53092                                     | 0.88095                                                   | 0.58813                                                   |

**Table S5.** The change of nitrate conversion yield and product selectivity of Cu–Co HNB, Cu–Co NPs and Cu Co mixture electrocatalytic systems in 12 h.

| <b>Electrocatalyst</b> | <b>Nitrate Removal (%)</b> | <b>N<sub>2</sub> Selectivity (%)</b> | <b>NH<sub>4</sub><sup>+</sup> Selectivity (%)</b> | <b>NO<sub>2</sub><sup>-</sup> Selectivity (%)</b> |
|------------------------|----------------------------|--------------------------------------|---------------------------------------------------|---------------------------------------------------|
| Cu–Co HNB              | 98.1428                    | 99.9988                              | 0                                                 | 0.00119                                           |
| Cu–Co NPs              | 89.3659                    | 88.8167                              | 11.1076                                           | 0.07564                                           |
| Cu Co mixture          | 77.6602                    | 55.2942                              | 43.7592                                           | 0.94658                                           |

**Table S6.** Nitrate removal efficiency and the selectivity of nitrogen in the presence of TBA.

| <b>Time (h)</b> | <b>Nitrate Removal (%)</b> | <b>N<sub>2</sub> Selectivity (%)</b> | <b>NH<sub>4</sub><sup>+</sup> Selectivity (%)</b> | <b>NO<sub>2</sub><sup>-</sup> Selectivity (%)</b> |
|-----------------|----------------------------|--------------------------------------|---------------------------------------------------|---------------------------------------------------|
| 0.5             | 10.2184                    | 39.7468                              | 8.0589                                            | 52.1943                                           |
| 1               | 20.7599                    | 18.9322                              | 15.9033                                           | 65.1645                                           |
| 3               | 56.3003                    | 33.8787                              | 7.3446                                            | 58.7767                                           |
| 6               | 74.9493                    | 53.8234                              | 25.6451                                           | 20.5316                                           |
| 12              | 79.9971                    | 78.4164                              | 7.1918                                            | 14.3918                                           |

**Table S7.** Reusability of Cu–Co HNB electrode.

| <b>Cycles</b> | <b>Nitrate<br/>Removal (%)</b> | <b>N<sub>2</sub><br/>Selectivity<br/>(%)</b> | <b>NH<sub>4</sub><sup>+</sup><br/>Selectivity<br/>(%)</b> | <b>NO<sub>2</sub><sup>-</sup><br/>Selectivity<br/>(%)</b> |
|---------------|--------------------------------|----------------------------------------------|-----------------------------------------------------------|-----------------------------------------------------------|
| 1             | 98.1428                        | 99.9988                                      | 0                                                         | 0.00119                                                   |
| 2             | 97.8295                        | 99.89218                                     | 0.088041                                                  | 0.019782                                                  |
| 3             | 96.66177                       | 94.32062                                     | 5.542381                                                  | 0.136999                                                  |
| 4             | 93.0707                        | 90.18784                                     | 9.648222                                                  | 0.163938                                                  |
| 5             | 95.66916                       | 92.21453                                     | 7.711579                                                  | 0.073891                                                  |

**Table S8.** Effect of different  $\text{Cl}^-$  contents on electrocatalytic reduction performance of Cu-Co HNB for 12h.

| $C_0 (\text{Cl}^-)$ (ppm) | Nitrate<br>Removal (%) | $\text{N}_2$<br>Selectivity (%) | $\text{NH}_4^+$<br>Selectivity (%) | $\text{NO}_2^-$<br>Selectivity (%) |
|---------------------------|------------------------|---------------------------------|------------------------------------|------------------------------------|
| 0                         | 98.1428                | 99.9988                         | 0                                  | 0.00119                            |
| 500                       | 96.48825               | 99.99445                        | 0                                  | 0.00555                            |
| 1000                      | 90.77542               | 99.93514                        | 0.00539                            | 0.05948                            |
| 1500                      | 88.45932               | 99.87523                        | 0.00829                            | 0.11647                            |
| 2000                      | 84.65799               | 99.83659                        | 0.01444                            | 0.14897                            |

**Table S9.** Summary of nitrate conversion efficiency of different catalysts.

| <b>Materials</b>                                                               | <b>C<sub>0</sub>(NO<sub>3</sub><sup>-</sup>-N)<br/>(ppm)</b> | <b>Electrolyte</b>                                                               | <b>Nitrate<br/>removal<br/>(%)</b> | <b>Nitrogen<br/>selectivity<br/>(%)</b> | <b>Ref.</b> |
|--------------------------------------------------------------------------------|--------------------------------------------------------------|----------------------------------------------------------------------------------|------------------------------------|-----------------------------------------|-------------|
| Cu/Fe@NCNFs-700                                                                | 100                                                          | 0.02 M NaCl+0.1 M Na <sub>2</sub> SO <sub>4</sub>                                | 76                                 | 94                                      | 2           |
| Ni/Fe <sub>3</sub> O <sub>4</sub>                                              | 50                                                           | 0.01 M NaCl                                                                      | 90.2                               | 88.8                                    | 3           |
| nZVI/OMC                                                                       | 50                                                           | 0.02 M NaCl                                                                      | 67                                 | 74                                      | 4           |
| Ni-TNTA                                                                        | 50                                                           | 0.3 g L <sup>-1</sup> NaCl+0.5 g L <sup>-1</sup> Na <sub>2</sub> SO <sub>4</sub> | 89.6                               | ~100                                    | 5           |
| CL-Fe@C(74%)                                                                   | 50                                                           | 0.02 M NaCl                                                                      | 50                                 | 50                                      | 6           |
|                                                                                |                                                              | 0.1 M Na <sub>2</sub> SO <sub>4</sub>                                            | 83                                 | 35                                      |             |
| FeNi/g-mesoC/NF                                                                | 50                                                           | 0.02 M NaCl+0.05 M Na <sub>2</sub> SO <sub>4</sub>                               | 75                                 | 100                                     | 7           |
|                                                                                |                                                              | 0.05 M Na <sub>2</sub> SO <sub>4</sub>                                           | 88                                 | 28                                      |             |
| Co <sub>3</sub> O <sub>4</sub> -TiO <sub>2</sub> /Ti                           | 50                                                           | 1000 ppm Cl <sup>-</sup> +0.1 M Na <sub>2</sub> SO <sub>4</sub>                  | 60                                 | 71                                      | 8           |
| Fe(20%)@N-C                                                                    | 50                                                           | 1 g L <sup>-1</sup> NaCl+0.05 M Na <sub>2</sub> SO <sub>4</sub>                  | 83                                 | 100                                     | 9           |
|                                                                                |                                                              | 0.05 M Na <sub>2</sub> SO <sub>4</sub>                                           | 76.3                               | 25                                      |             |
| Fe-Cu/D407                                                                     | 50                                                           | /                                                                                | 85                                 | 55                                      | 10          |
| Cu/Ni                                                                          | 50                                                           | 0.1 M Na <sub>2</sub> SO <sub>4</sub>                                            | 99                                 | 55.6                                    | 11          |
| Cu-N-C-800                                                                     | 50                                                           | 0.05 M Na <sub>2</sub> SO <sub>4</sub>                                           | 97.3                               | 19.5                                    | 12          |
| PdCu NCs-NOMC                                                                  | 100                                                          | 0.1 M Na <sub>2</sub> SO <sub>4</sub>                                            | 86                                 | 60                                      | 13          |
| Cu-Pd/ Hematite                                                                | 30                                                           | /                                                                                | 94                                 | 72.4                                    | 14          |
| Pd-Cu/TiO <sub>2</sub> NFs                                                     | 30                                                           | /                                                                                | 92.9                               | 86.2                                    | 15          |
| Cu <sub>1%</sub> (900 °C)-Pd <sub>2.5%</sub> /γ-Al <sub>2</sub> O <sub>3</sub> | 50                                                           | 0.05 M Na <sub>2</sub> SO <sub>4</sub>                                           | 100                                | 61.56                                   | 16          |
| Cu-Co HNB                                                                      | 100                                                          | 0.1 M Na <sub>2</sub> SO <sub>4</sub>                                            | 98.1                               | ~100                                    | This work   |



## Reference:

1. H. Hu, B. Y. Guan and X. W. Lou, Construction of complex CoS hollow structures with enhanced electrochemical properties for hybrid supercapacitors, *Chem*, 2016, **1**, 102-113.
2. Y. Lan, H. Luo, Y. Ma, Y. Hua, T. Liao and J. Yang, Synergy between copper and iron sites inside carbon nanofibers for superior electrocatalytic denitrification, *Nanoscale*, 2021, **13**, 10108-10115.
3. Z. A. Jonoush, A. Rezaee and A. Ghaffarinejad, Electrocatalytic nitrate reduction using Fe<sup>0</sup>/Fe<sub>3</sub>O<sub>4</sub> nanoparticles immobilized on nickel foam: Selectivity and energy consumption studies, *J. Cleaner Prod.*, 2020, **242**, 118569.
4. W. Teng, N. Bai, Y. Liu, Y. Liu, J. Fan and W. X. Zhang, Selective nitrate reduction to dinitrogen by electrocatalysis on nanoscale iron encapsulated in mesoporous carbon, *Environ. Sci. Technol.*, 2018, **52**, 230-236.
5. F. Liu, K. Liu, M. Li, S. Hu, J. Li, X. Lei and X. Liu, Fabrication and characterization of a Ni-TNTA bimetallic nanoelectrode to electrochemically remove nitrate from groundwater, *Chemosphere*, 2019, **223**, 560-568.
6. L. Su, D. Han, G. Zhu, H. Xu, W. Luo, L. Wang, W. Jiang, A. Dong and J. Yang, Tailoring the assembly of iron nanoparticles in carbon microspheres toward high-performance electrocatalytic denitrification, *Nano Lett.*, 2019, **19**, 5423-5430.
7. X. Chen, T. Zhang, M. Kan, D. Song, J. Jia, Y. Zhao and X. Qian, Binderless and oxygen vacancies rich FeNi/graphitized mesoporous carbon/Ni foam for electrocatalytic reduction of nitrate, *Environmental Science & Technology*, 2020, **54**, 13344-13353.
8. J. Gao, B. Jiang, C. Ni, Y. Qi, Y. Zhang, N. Oturan and M. A. Oturan, Non-precious Co<sub>3</sub>O<sub>4</sub>-TiO<sub>2</sub>/Ti cathode based electrocatalytic nitrate reduction: Preparation, performance and mechanism, *Appl. Catal. B Environ.*, 2019, **254**, 391-402.
9. W. Duan, G. Li, Z. Lei, T. Zhu, Y. Xue, C. Wei and C. Feng, Highly active and durable carbon electrocatalyst for nitrate reduction reaction, *Water Res.*, 2019, **161**, 126-135.
10. T. Tang, Q. Xing, S. Zhang, Y. Mu, X. Jiang, Z. Zhou, X. Xiao and J. Zou, High selective reduction of nitrate into nitrogen by novel Fe-Cu/D407 composite with excellent stability and activity, *Environ. Pollut.*, 2019, **252**, 888-896.
11. Y. Shih, Z. Wu, Y. Huang and C. Huang, Electrochemical nitrate reduction as affected by the crystal morphology and facet of copper nanoparticles supported on nickel foam electrodes (Cu/Ni), *Chem. Eng. J.*, 2020, **383**, 123157.
12. T. Zhu, Q. Chen, P. Liao, W. Duan, S. Liang, Z. Yan and C. Feng, Single-atom Cu catalysts for enhanced electrocatalytic nitrate reduction with significant alleviation of nitrite production, *Small*, 2020, **16**, 2004526.
13. H. Xu, H. Xu, Z. Chen, X. Ran, J. Fan, W. Luo, Z. Bian, W. X. Zhang and J. Yang, Bimetallic pdcu nanocrystals immobilized by nitrogen-containing

- ordered mesoporous carbon for electrocatalytic denitrification, *ACS Appl. Mater. Interfaces*, 2019, **11**, 3861-3868.
14. S. Jung, S. Bae and W. Lee, Development of Pd-Cu/hematite catalyst for selective nitrate reduction, *Environ. Sci. Technol.*, 2014, **48**, 9651-9658.
  15. Q. Wang, W. Wang, B. Yan, W. Shi, F. Cui and C. Wang, Well-dispersed Pd-Cu bimetals in TiO<sub>2</sub> nanofiber matrix with enhanced activity and selectivity for nitrate catalytic reduction, *Chem. Eng. J.*, 2017, **326**, 182-191.
  16. F. Shi, J. Li, J. Liang, C. Bao, J. Gu, K. Li and J. Jia, Highly dispersed Pd-Cu bimetallic nanocatalyst based on  $\gamma$ -Al<sub>2</sub>O<sub>3</sub> combined with electrocatalytic in-situ hydrogen production for nitrate hydroreduction, *Chem. Eng. J.*, 2022, **434**, 134748.
